# Supplementary material for: Evaluating the Longitudinal Item and Category Stability of the SF-36 Full and Summary Scales Using Rasch Analysis
Source: Biomed Res Int. 2018 Nov 4;2018:1013453. doi: 10.1155/2018/1013453 (PMC6241362; doi:10.1155/2018/1013453)
Supplement: Supplementary Materials — One supplementary file submitted containing the below figures: Supplemental Figure 1: SF36 total scale Rasch analysis Person—item map for six waves of data collection. Supplemental Figure 2. Supplemental Figure 3: SF36 physical health scale Rasch analysis Person—item map for six waves of data collection. Supplemental Figure 4. Supplemental Figure 5: SF36 mental health scale Rasch analysis Person—item map for six waves of data collection. Supplemental Figure 6. [file 1013453.f1.docx]

**Supplemental Figure 1: SF-36 total scale Rasch analysis Person – Item Map for six waves of data collection**

| **Wave 1** | **Wave 2** | **Wave 3** | **Wave 4** | **Wave 5** | **Wave 6** |
| --- | --- | --- | --- | --- | --- |
| SF-36 PERSON-ITEM MAP  <more>|<rare>  2 + PF1  |  | RP2  | RP3 | RP4  | RP1  |S RE2 | SF1  1 + RE1 | RE3  . | PF4  | BP2  . | PF6 | PF7  . | GH3 | PF2 | PF3  . | PF5 | MH5  0 . +M GH5 | PF8  . T| PF9  .## | GH1 | HT | PF10 | BP1 | MH3  .########## S|  .############ M| GH4 | VT1  .####### | VT2  -1 .### S+  .# T|S VT4  . | SF2 | GH2  . |  . | VT3  . |  -2 . + MH1 | MH4  . |T  . |  . |  . | MH2  |  -3 +  |  . |  |  |  |  -4 +  . |  . |  |  |  |  -5 . +  <less>|<frequ>  EACH '#' IS 306. | SF-36 PERSON-ITEM MAP  <more>|<rare>  2 + PF1  | RP2  | RP3 | RP4  | RP1 | SF1  |S RE2  1 + RE1 | RE3  | PF4 | BP2  | PF6 | PF7  | PF2 | PF3 | MH5 | GH3  . | PF5  0 . +M PF8 | GH5  . T| PF9 | BP1 | MH3  .#### S| GH1 | HT | PF10  ############# M| VT1  .######## | VT2 | GH4  -1 .### S+  . T|S VT4  . | SF2 | GH2  . |  . | VT3  -2 . +  . | MH1 | MH4  |T  . |  . |  -3 + MH2  <less>|<frequ>  EACH '#' IS 330. | SF-36 PERSON-ITEM MAP  <more>|<rare>  2 + PF1  | RP2  | RP3 | RP4  | RP1  |S RE2  1 + PF4 | RE1 | RE3 | SF1  | PF6 | PF7  . | PF2  | PF3 | BP2 | GH3  . | PF5 | PF8 | MH5  0 . +M PF9 | GH5  . T| PF10 | MH3  .#### S| GH1 | BP1  .############ | HT | GH4  .########## M| VT1  -1 .#### S+ VT2  .# T|S VT4  . | SF2 | GH2  . | VT3  . |  -2 . +  . | MH4  . |T MH1  . |  |  -3 + MH2  <less>|<frequ>  EACH '#' IS 246. | SF-36 PERSON-ITEM MAP  <more>|<rare>  2 + PF1  | RP2 | RP4  | RP3  | RP1  |S RE2  1 + PF4 | RE1 | RE3  | PF6 | PF7  . | PF2 | SF1  | PF3 | PF8  . | PF5 | BP2 | MH5 | GH3  0 . +M PF9  . T| PF10 | MH3 | GH5  .## |  .############ S| GH1 | HT | BP1 | GH4  .########### M| VT1  -1 .##### S+ VT2 | VT4  .# T|S SF2  . | GH2  . | VT3  . |  -2 . +  . | MH4  . |T MH1  . |  |  -3 + MH2  <less>|<frequ>  EACH '#' IS 195. | SF-36 PERSON-ITEM MAP  <more>|<rare>  2 + RP2 | PF1  | RP3 | RP4  |  | RP1  |S RE2 | PF4  1 + RE1 | RE3 | PF7  | PF2 | PF6  |  | SF1 | PF3 | PF5 | PF8  | BP2 | MH5  0 . +M GH3 | PF9  . | PF10  .## T| MH3 | GH5  .########### S| BP1 | GH4 | GH1 | HT  .############ M|  -1 .####### S+ VT1 | VT4  .## T|S VT2 | SF2  . | GH2  . | VT3  . |  -2 . +  . | MH4  |T MH1  . |  | MH2  -3 +  <less>|<frequ>  EACH '#' IS 149. | SF-36 PERSON-ITEM MAP  <more>|<rare>  3 +  |  |T  | PF1  |  2 + RP2  | RP3 | RP4  |  | RP1  |S PF4 | PF7 | RE2  1 + PF2 | RE3  | PF6 | RE1  | PF3 | PF8  | PF5 | SF1  . | PF9  0 . +M BP2 | MH5 | GH3  . | PF10  .# T| MH3 | GH4 | GH5  .####### S| GH1 | BP1  .############ M| HT  -1 .######### S+ VT1 | VT4  .### |S SF2  . T| VT2  . | VT3 | GH2  . |  -2 . +  . | MH4  . | MH1  . |T  . | MH2  -3 +  <less>|<frequ>  EACH '#' IS 111. |

*Physical functioning (PF) 1: vigorous activities limited; PF2: moderate activities limited; PF3: lifting or carrying; PF4: climbing several flights of stairs limited; PF5: climbing one flight of stairs limited; PF6: bending, kneeling, or stooping limited; PF7: walking more than one kilometre limited; PF8: walking half kilometre limited; PF9: walking 100 metres limited; PF10: bathing or dressing limited*

*Role-Physical (RP) 1: cut down time spent on work/activity; RP2: accomplish less; RP3: limited in type of work; RP4: difficulty performing*

*Bodily Pain (BP) 1: intensity of bodily pain; BP2: pain interfered with work*

*General health (GH) 1: general health; GH2: get sick easier than other people; GH3: as healthy as anybody I know; GH4: expect my health to get worse; GH5: my health is excellent*

*Vitality (VT) 1: feel full of life; VT2: have a lot of energy; VT3: feel worn out; VT4: feel tired*

*Social functioning (SF) 1: health interfere with social activities; SF2: how much time health problems interfere with social activities*

*Role-Emotional (RE) 1: cut down time spent on work/activity; RE2: accomplish less; RE3: less careful at work*

*Mental Health (MH) 1: felt nervous; MH2: felt down in dumps; MH3: felt calm and peaceful; MH4: felt down; MH5: felt happy*

*Reported Health Transition (HT): Health now compared to 1 year ago*

**Supplemental Figure 2: SF-36 total scale Rasch analysis Category Probabilities for six waves of data collection**

| WAVE 1 CATEGORY PROBABILITIES: MODES - Structure measures at intersections (p.73)  P ++-------+-------+-------+-------+-------+-------+-------++  R 1.0 + +  O | |  B |11 |  A | 111 |  B .8 + 11 66+  I | 11 66 |  L | 11 6 |  I | 1 66 |  T .6 + 11 6 +  Y | 1 66 |  .5 + 1 6 +  O | 1*22222222 6 |  F .4 + 222 1 22 333 55555*55 +  | 22 1 33* 333 55 6 555 |  R | 22 11 33 22 35 66 55 |  E | 22 *3 2 4*** 6 55 |  S .2 + 222 33 11 4**5 **44 555+  P | 222 33 11 44 5 2 6633 44 |  O |22 333 4** 55 ** 33 4444 |  N | 333333 44444555*11*66 2222 3333 44444 |  S .0 +**************************666666 11111111****************+  E ++-------+-------+-------+-------+-------+-------+-------++  -4 -3 -2 -1 0 1 2 3  PERSON [MINUS] ITEM MEASURE | WAVE 2 CATEGORY PROBABILITIES: MODES - Structure measures at intersections  P ++-------+-------+-------+-------+-------+-------+-------++  R 1.0 + +  O | |  B |1 |  A | 111 |  B .8 + 111 6+  I | 11 66 |  L | 1 66 |  I | 11 66 |  T .6 + 1 6 +  Y | 11 6 |  .5 + 1 22 66 +  O | *222 2222 6 |  F .4 + 22 11 2233333 55555*555 +  | 22 1 332 33 5 6 55 |  R | 22 1 33 22 355 6 55 |  E | 222 1*3 2 4***4 66 555 |  S .2 + 22 33 11 4**5 3*44 55+  P | 222 33 11 44 5 2 6633 444 |  O |22 333 4** 55 ** 33 444 |  N | 333333 44444555*11*66 2222 3333 444444 |  S .0 +**************************666666 11111111****************+  E ++-------+-------+-------+-------+-------+-------+-------++  -4 -3 -2 -1 0 1 2 3  PERSON [MINUS] ITEM MEASURE |
| --- | --- |
| Wave 3 CATEGORY PROBABILITIES: MODES - Structure measures at intersections  P ++-------+-------+-------+-------+-------+-------+-------++  R 1.0 + +  O | |  B |11 |  A | 111 |  B .8 + 11 66+  I | 11 6 |  L | 11 66 |  I | 1 66 |  T .6 + 11 6 +  Y | 1 6 |  .5 + 1 66 +  O | 1*2222222 6 |  F .4 + 222 1 22 33 5555*55 +  | 22 1 3** 333 55 6 555 |  R | 22 11 33 2 3355 6 55 |  E | 22 *3 22 44**44466 555 |  S .2 + 222 33 11 44*55 336444 55+  P | 222 33 11 44 522 6633 44 |  O |22 333 44*1 55 ** 33 444 |  N | 333333 44444 555*11*66 2222 3333 444444 |  S .0 +**************************666666 11111111****************+  E ++-------+-------+-------+-------+-------+-------+-------++  -4 -3 -2 -1 0 1 2 3  PERSON [MINUS] ITEM MEASURE | WAVE 4 CATEGORY PROBABILITIES: MODES - Structure measures at intersections  P ++-------+-------+-------+-------+-------+-------+-------++  R 1.0 + +  O | |  B |11 |  A | 111 |  B .8 + 111 66+  I | 11 66 |  L | 1 6 |  I | 11 66 |  T .6 + 1 6 +  Y | 11 6 |  .5 + 1 66 +  O | 12222222 6 |  F .4 + 22211 22 55555*55 +  | 22 1 **3333 55 6 555 |  R | 22 1 333 2 33 5 6 55 |  E | 22 1* 22444**44466 55 |  S .2 + 222 33 1 44255 336444 555+  P | 222 333 11 44 5522 663 44 |  O |222 333 44*155 ** 333 444 |  N | 33333 44444 555111*66 2222 3333 444444 |  S .0 +**************************666666 11111111****************+  E ++-------+-------+-------+-------+-------+-------+-------++  -4 -3 -2 -1 0 1 2 3  PERSON [MINUS] ITEM MEASURE |
| Wave 5 CATEGORY PROBABILITIES: MODES - Structure measures at intersections  P ++-------+-------+-------+-------+-------+-------+-------++  R 1.0 + +  O | |  B |111 |  A | 111 |  B .8 + 11 66+  I | 11 66 |  L | 11 66 |  I | 1 6 |  T .6 + 11 6 +  Y | 1 66 |  .5 + 11 6 +  O | 1222222 6 |  F .4 + 2221 22 5555*55 +  | 22 1 2*333 55 6 55 |  R | 222 11 333 2 33*4** 66 555 |  E | 22 *3 2*44 * 44* 55 |  S .2 + 222 33 11 44 255 33 6 44 555+  P | 222 33 144 5522 6*3 44 |  O |222 333 4411*5 ** 33 444 |  N | 333333 44444 555 1***6 222 3333 444444 |  S .0 +**************************66666 111111*****************+  E ++-------+-------+-------+-------+-------+-------+-------++  -4 -3 -2 -1 0 1 2 3  PERSON [MINUS] ITEM MEASURE | Wave 6 CATEGORY PROBABILITIES: MODES - Structure measures at intersections  P ++---------+---------+---------+---------+---------+---------++  R 1.0 + +  O | |  B | |  A | |  B .8 +1 666+  I | 11 66 |  L | 11 66 |  I | 11 66 |  T .6 + 11 66 +  Y | 11 6 |  .5 + 1 66 +  O | 112222222 6 |  F .4 + 22221 222 5555**5 +  | 222 11 2*3333 555 6 5555 |  R | 22 11 3333 22 33*44** 66 555 |  E | 222 *3 2444 ** 444* 555 |  S .2 +22 333 11 4442255 33 66 444 555 +  P | 333 1144 5522 6*33 444 5|  O | 333 444411155 *** 33 444 |  N | 3333333 44444 5555511***6 2222 333333 4444444 |  S .0 +**********************6666666 11111111*********************+  E ++---------+---------+---------+---------+---------+---------++  -3 -2 -1 0 1 2 3  PERSON [MINUS] ITEM MEASURE |

**Supplemental Figure 3: SF-36 physical health scale Rasch analysis Person – Item Map for six waves of data collection**

| **Wave 1** | **Wave 2** | **Wave 3** | **Wave 4** | **Wave 5** | **Wave 6** |
| --- | --- | --- | --- | --- | --- |
| SF-36 PERSON-ITEM MAP  <more>|<rare>  2 +  |T  . | PF1  | RP2  | RP3 | RP4  1 . +S RP1  |  | PF4  . | BP2  | PF6 | PF7  0 . +M GH3 | PF2 | PF3  | PF5  . | GH5 | PF8  . | PF9  . | GH1 | PF10 | BP1  -1 . T+S  .# | GH4  .########## S|  .############ |  .####### M|T  -2 .######## +  .##### S| GH2  .## |  .# T|  . |  -3 . +  . |  . |  . |  . |  -4 . +  . |  . |  |  . |  -5 +  . |  |  |  |  -6 . +  <less>|<frequ>  EACH '#' IS 243. | SF-36 PERSON-ITEM MAP  <more>|<rare>  2 +T  |  | PF1  | RP2  | RP3 | RP4  1 +S RP1 | BP1  |  |  | PF4  | PF6 | PF7  0 +M PF2 | PF3 | GH3  | PF5  . | PF8 | GH5  | PF9  . | PF10 | BP2  -1 . +S GH1  .# T|  .###### S| GH4  .############ |  .############ M|  -2 .###### +T  .###### S|  .### | GH2  .# T|  . |  -3 . +  . |  . |  . |  . |  -4 . +  . |  |  |  |  -5 +  <less>|<frequ>  EACH '#' IS 197. | SF-36 PERSON-ITEM MAP  <more>|<rare>  2 +T  |  | PF1  | RP2  | RP3 | RP4  1 +S RP1  |  | PF4  | PF6 | PF7  | PF2  0 . +M PF3 | BP2 | GH3  | PF5 | PF8  | GH5  . | PF9  . | PF10  -1 . +S GH1 | BP1  .# T| GH4  .###### |  .############ S|  .############ |  -2 .######## M+T  .######## |  .### S| GH2  .## |  . T|  -3 . +  . |  . |  . |  . |  -4 . +  . |  |  . |  . |  -5 +  . |  |  |  |  -6 . +  <less>|<freq>  EACH "#" IS 144: EACH "." IS 1 TO 143 | SF-36 PERSON-ITEM MAP  <more>|<rare>  2 +T  |  | PF1  | RP2 | RP4  | RP3  1 . +S RP1  |  | PF4  | PF6 | PF7  | PF2  0 +M PF3 | PF8  | PF5 | BP2 | GH3  | PF9  . | GH5  . | PF10  -1 . +S GH1 | BP1  .# T| GH4  .##### |  .########### S|  .############ |  -2 .############ M+T  .########## |  .#### S| GH2  .## T|  . |  -3 . +  . |  . |  . |  . |  -4 . +  . |  . |  . |  |  -5 . +  |  |  |  |  -6 . +  <less>|<frequ>  EACH '#' IS 113. | SF-36 PERSON-ITEM MAP  <more>|<rare>  2 +T  |  | PF1  | RP2 | RP4  | RP3  1 +S RP1  |  | PF4 | PF7  | PF2  | PF6  0 +M PF3 | PF5 | PF8  |  | BP2 | GH3 | PF9  . |  . | GH5 | PF10  -1 . +S GH4  .# T| BP1 | GH1  .##### |  .########## S|  .############ |  -2 .############ M+T  .######## |  .####### S| GH2  .## |  . T|  -3 . +  . |  . |  . |  . |  -4 . +  . |  . |  . |  |  -5 +  <less>|<frequ>  EACH '#' IS 89. | SF-36 PERSON-ITEM MAP  <more>|<rare>  2 +  | PF1  |  | RP2 | RP4  | RP3  1 +S RP1  | PF4 | PF7  |  | PF2 | PF6  | PF8  0 +M PF3 | PF5  |  | PF9  | BP2 | GH3  . | PF10  -1 . +S GH4 | GH5  . T|  .## | GH1 | BP1  .####### S|  .######### |  -2 .############ M+  .############ |T  .####### S| GH2  .##### |  .# T|  -3 . +  . |  . |  . |  . |  -4 . +  . |  . |  |  |  -5 +  |  |  |  |  -6 . +  <less>|<freq>  EACH "#" IS 66: EACH "." IS 1 TO 65 |

Physical functioning (PF) 1: vigorous activities limited; PF2: moderate activities limited; PF3: lifting or carrying; PF4: climbing several flights of stairs limited; PF5: climbing one flight of stairs limited; PF6: bending, kneeling, or stooping limited; PF7: walking more than one kilometre limited; PF8: walking half kilometre limited; PF9: walking 100 metres limited; PF10: bathing or dressing limited

Role-Physical (RP) 1: cut down time spent on work/activity; RP2: accomplish less; RP3: limited in type of work; RP4: difficulty performing

Bodily Pain (BP) 1: intensity of bodily pain; BP2: pain interfered with work

General health (GH) 1: general health; GH2: get sick easier than other people; GH3: as healthy as anybody I know; GH4: expect my health to get worse; GH5: my health is excellent

**Supplemental Figure 4: SF-36 physical health scale Rasch analysis Category Probabilities for six waves of data collection**

| WAVE 1 CATEGORY PROBABILITIES: MODES - Structure measures at intersections  P ++-----+-----+-----+-----+-----+-----+-----+-----+-----+-----++  R 1.0 + +  O | |  B | |  A | 55555 66|  B .8 +1 55 555 66 +  I | 11 55 55 6 |  L | 1 5 5 66 |  I | 1 5 55 6 |  T .6 + 1 5 5 6 +  Y | 1 5 5 66 |  .5 + 1 333 5 * +  O | 122222 33 33 5 6 55 |  F .4 + 221 2* 35 6 5 +  | 22 1 3 2 53 66 5 |  R | 2 133 22 5 3 6 55 |  E | 22 31 2 5 3 6 5 |  S .2 +22 3 1 25 4444* 66 55 +  P | 33 11 *** *44 666 55|  O | 33 1*4* 2 334444666 |  N | 3333 444*5*11 2222 6****444444 |  S .0 +****************66666****************************************+  E ++-----+-----+-----+-----+-----+-----+-----+-----+-----+-----++  -4 -3 -2 -1 0 1 2 3 4 5 6  PERSON [MINUS] ITEM MEASURE | WAVE 2 CATEGORY PROBABILITIES: MODES - Structure measures at intersections  P ++-----+-----+-----+-----+-----+-----+-----+-----+-----+-----++  R 1.0 + +  O | |  B | |  A | 555 66|  B .8 +1 555 5555 66 +  I | 1 5 55 6 |  L | 11 5 5 66 |  I | 1 5 55 6 |  T .6 + 1 5 5 6 +  Y | 1 5 5 6 |  .5 + 1 33333 5 *6 +  O | 12222 33 3 5 6 55 |  F .4 + 221 2*2 35 6 5 +  | 22 1 3 2 * 6 5 |  R | 22 13 2 5 3 66 55 |  E | 2 31 22 5 3 6 5 |  S .2 +22 33 1 2544444*4 66 55 +  P | 3 1 4** 3*44 66 55|  O | 33 11445 22 3 4444666 |  N | 3333 444***11 222 6****6444444 |  S .0 +****************66666****************************************+  E ++-----+-----+-----+-----+-----+-----+-----+-----+-----+-----++  -4 -3 -2 -1 0 1 2 3 4 5 6  PERSON [MINUS] ITEM MEASURE |
| --- | --- |
| WAVE 3 Physical CATEGORY PROBABILITIES: MODES - Andrich thresholds at intersections  P -+-----+-----+-----+-----+-----+-----+-----+-----+-----+-----+-  R 1.0 + +  O | |  B | |  A | 55555 6|  B .8 +1 55 555 66 +  I | 11 55 55 66 |  L | 1 5 55 6 |  I | 1 5 5 6 |  T .6 + 1 5 55 66 +  Y | 1 5 5 6 |  .5 + 1 33 5 * +  O | 1 222 33 33 5 6 5 |  F .4 + 22* 223 3 5 66 55 +  | 2 1 3322 * 6 5 |  R | 22 13 2 53 6 5 |  E | 22 31 2 5 3 66 55 |  S .2 +22 3 1 22*4444**4 66 55 +  P | 33 11 4*2 3444 66 5|  O | 33 ***5 22 33 4444666 |  N | 3333 444455111 222 6***66444444 |  S .0 +****************66666****************************************+  E -+-----+-----+-----+-----+-----+-----+-----+-----+-----+-----+-  -4 -3 -2 -1 0 1 2 3 4 5 6  PERSON [MINUS] ITEM MEASURE | WAVE 4 CATEGORY PROBABILITIES: MODES - Structure measures at intersections  P ++-----+-----+-----+-----+-----+-----+-----+-----+-----+-----++  R 1.0 + +  O | |  B | |  A | 5 66|  B .8 +11 5555 5555 66 +  I | 1 5 55 66 |  L | 11 55 55 6 |  I | 1 5 5 6 |  T .6 + 1 5 55 66 +  Y | 1 5 5 6 |  .5 + 1 5 * +  O | 1 3333 5 6 5 |  F .4 + 22*222233 33 5 6 55 +  | 22 1 322 * 66 5 |  R | 2 13 2 53 6 5 |  E | 22 31 22 544*4 66 55 |  S .2 + 22 33 1 **4 3444 6 55 +  P |2 3 1 4452 33 444 666 55|  O | 333 **55 22 33 44*66 |  N | 3333 444455111 222 6***6 444444 |  S .0 +****************66666****************************************+  E ++-----+-----+-----+-----+-----+-----+-----+-----+-----+-----++  -4 -3 -2 -1 0 1 2 3 4 5 6  PERSON [MINUS] ITEM MEASURE |
| WAVE 5 CATEGORY PROBABILITIES: MODES - Structure measures at intersections  P ++-----+-----+-----+-----+-----+-----+-----+-----+-----+-----++  R 1.0 + +  O | |  B | 6|  A |1 66 |  B .8 + 1 5555555 66 +  I | 11 55 55 66 |  L | 1 5 55 6 |  I | 1 5 5 6 |  T .6 + 1 5 55 66 +  Y | 1 5 5 6 |  .5 + 1 5 * +  O | 1 333 5 6 5 |  F .4 + 2*2222233 3 5 6 55 +  | 22 1 32 335 66 5 |  R | 22 133 22 53 6 5 |  E | 22 31 2 *44*44 66 55 |  S .2 + 22 3 1 ** 3 444 6 55 +  P |2 33 11 4452 33 44 666 55 |  O | 33 4*55 22 3 4**6 5|  N | 3333 4444551111 222 6**** 444444 |  S .0 +****************666666***************************************+  E ++-----+-----+-----+-----+-----+-----+-----+-----+-----+-----++  -4 -3 -2 -1 0 1 2 3 4 5 6  PERSON [MINUS] ITEM MEASURE | WAVE 6 CATEGORY PROBABILITIES: MODES - Andrich thresholds at intersections  P -+-----+-----+-----+-----+-----+-----+-----+-----+-----+-----+-  R 1.0 + +  O | |  B | |  A |1 66|  B .8 + 11 555555555 66 +  I | 1 5 55 66 |  L | 1 55 55 6 |  I | 1 5 5 66 |  T .6 + 1 5 5 6 +  Y | 1 5 55 6 |  .5 + 1 5 * +  O | 1 5 6 5 |  F .4 + 2*2222 333333 5 66 5 +  | 22 1 *2 35 6 55 |  R | 22 133 2 53 6 5 |  E | 22 31 22 4*4**44 66 55 |  S .2 + 22 3 1 4*5 3 444 66 55 +  P |2 33 11 4 52 3 44 66 55|  O | 33 44*55 22 33 44*66 |  N | 3333 444555111 222 6****6 444444 |  S .0 +***************666666****************************************+  E -+-----+-----+-----+-----+-----+-----+-----+-----+-----+-----+-  -4 -3 -2 -1 0 1 2 3 4 5 6  PERSON [MINUS] ITEM MEASURE |

**Supplemental Figure 5: SF-36 mental health scale Rasch analysis Person – Item Map for six waves of data collection**

| **Wave 1** | **Wave 2** | **Wave 3** | **Wave 4** | **Wave 5** | **Wave 6** |
| --- | --- | --- | --- | --- | --- |
| SF-36 Person-Item Map  <more>|<rare>  2 +  . |  |  . | RE2 | SF1  . | RE3  . | RE1  . |S  1 . +  . |  . |  . T| MH5  .# |  .### S|  .####### | MH3  0 ############# +M VT1  .############ M| VT2  .####### |  .### S|  .## | VT4  . T| SF2  . | VT3  -1 . +  . |S  . | MH1 | MH4  . |  . |  . |  . | MH2  -2 . +  . |T  . |  . |  |  |  . |  -3 +  |  |  |  |  . |  |  -4 . +  <less>|<freq>  EACH "#" IS 224: EACH "." IS 1 TO 223 | SF-36 Person-Item Map  <more>|<rare>  2 +  | SF1  . | RE2  |  . | RE1 | RE3  . |S  1 . +  . |  . | MH5  .# T|  .#### | MH3  .######## S|  0 .########### M+M VT1  .############ | VT2  .#### S|  .# | VT4  . T| SF2  . |  -1 . + VT3  . |S  . | MH4  . | MH1  |  . |  -2 . + MH2  |  . |T  |  . |  |  -3 +  |  |  . |  |  |  -4 +  |  |  |  |  |  -5 . +  <less>|<frequ>  EACH '#' IS 224. | SF-36 Person-Item Map  <more>|<rare>  4 . +  |  |  |  |  |  3 +  |  |  |  |T  |  2 +  | RE2  |  | RE1 | RE3  . | SF1  . |S  1 . +  . |  . T| MH5  .## |  .#### S| MH3  .######## |  0 .########### M+M  .############ | VT1  .### S| VT2  .# | VT4 | SF2  . T|  . | VT3  -1 . +  . |S  . | MH4  . | MH1  . |  . |  -2 . +  . | MH2  . |T  . |  . |  |  -3 . +  |  |  |  |  |  -4 +  |  |  |  |  |  -5 . +  <less>|<frequ>  EACH '#' IS 177. | SF-36 Person-Item Map  <more>|<rare>  4 . +  |  |  |  |  |  3 +  |  |  |  . |T  |  2 +  . | RE2  . |  . | RE1 | RE3  . |  . |S SF1  1 . +  . |  . | MH5  .# T|  .#### S| MH3  .####### |  0 .############ M+M  .############ | VT1  #### S| VT2 | VT4  .## | SF2  . T|  . | VT3  -1 . +  . |S  . | MH4  . | MH1  . |  . |  -2 . + MH2  |  . |T  . |  |  |  -3 +  . |  |  |  |  |  -4 +  |  |  |  |  |  -5 . +  <less>|<freq>  EACH "#" IS 151: EACH "." IS 1 TO 150 | SF-36 Person-Item Map  <more>|<rare>  4 . +  |  |  |  |  |  3 +  |  |  |  |  . |T  2 +  | RE2  |  | RE1 | RE3  |  . |S  1 . + SF1  . |  . | MH5  .# T|  .## | MH3  .######## S|  0 .########## M+M  .############ | VT1  .#### S| VT2 | VT4  .## | SF2  . T| VT3  . |  -1 . +  . |S  . | MH4  . | MH1  . |  . |  -2 . + MH2  . |T  |  |  |  |  -3 . +  |  |  |  |  |  -4 +  |  |  |  |  |  -5 . +  <less>|<freq>  EACH "#" IS 124: EACH "." IS 1 TO 123 | SF-36 Person-Item Map  <more>|<rare>    3 +  |  |  |  |  |T  . |  2 +  | RE2  |  | RE1 | RE3  . |  |  |S  1 . + SF1  . |  . | MH5  . T|  .# |  .#### S| MH3  .######## |  0 .############ M+M  .########### |  .####### S| VT1 | VT4  .### | SF2  ## | VT2  . T| VT3  . |  -1 . +  . |S  . | MH4  . | MH1  . |  . |  . | MH2  -2 . +  |  |T  . |  . |  |  . |  -3 +  <less>|<freq>  EACH "#" IS 71: EACH "." IS 1 TO 70 |

*Vitality (VT) 1: feel full of life; VT2: have a lot of energy; VT3: feel worn out; VT4: feel tired, Social functioning (SF) 1: health interfere with social activities; SF2: how much time health problems interfere with social activities*

*Role-Emotional (RE) 1: cut down time spent on work/activity; RE2: accomplish less; RE3: less careful at work, Mental Health (MH) 1: felt nervous; MH2: felt down in dumps; MH3: felt calm and peaceful; MH4: felt down; MH5: felt happy*

*Reported Health Transition (HT): Health now compared to 1 year ago*

**Supplemental Figure 6: SF-36 mental health scale Rasch analysis Category Probabilities for six waves of data collection**

| Wave 1 Mental health CATEGORY PROBABILITIES: MODES - Andrich thresholds at intersections  P -+-------+-------+-------+-------+-------+-------+-------+-  R 1.0 + +  O | |  B |11 |  A | 111 66|  B .8 + 11 66 +  I | 11 66 |  L | 11 66 |  I | 11 6 |  T .6 + 1 22 66 +  Y | 11 2222 222 6 |  .5 + 122 2 6 +  O | 2211 22 6 |  F .4 + 22 1 2 6 +  | 2 11 2 555*5555 |  R | 22 1 244** 6 555 |  E | 222 11 44* 5 ** 55 |  S .2 + 22 11 4 5*2 6 44 555 +  P | 222 3***33*333* 444 555|  O |22 333*4411*5 663** 444 |  N | 333333*444 5555 ***1 ***33 44444 |  S .0 +**************************66666 1111111***************+  E -+-------+-------+-------+-------+-------+-------+-------+-  -4 -3 -2 -1 0 1 2 3  PERSON [MINUS] ITEM MEASURE | WAVE 2 CATEGORY PROBABILITIES: MODES - Structure measures at intersections  P ++-------+-------+-------+-------+-------+-------+-------++  R 1.0 + +  O | |  B |1 |  A | 111 66|  B .8 + 11 66 +  I | 11 66 |  L | 11 66 |  I | 11 6 |  T .6 + 1 222222 6 +  Y | 11 222 22 66 |  .5 + 122 2 6 +  O | 2211 2 6 |  F .4 + 22 1 2 6 +  | 2 11 2 555*5555 |  R | 22 1 244** 6 555 |  E | 222 11 4425 4*4 55 |  S .2 + 22 11 44 552 66 44 555 +  P | 222 ****33*333* 44 555|  O |2 33334411*5 663** 444 |  N | 333333*44445555 *** ***33 44444 |  S .0 +**************************66666 11111111***************+  E ++-------+-------+-------+-------+-------+-------+-------++  -4 -3 -2 -1 0 1 2 3  PERSON [MINUS] ITEM MEASURE |
| --- | --- |
| WAVE 3 CATEGORY PROBABILITIES: MODES - Structure measures at intersections  P ++-------+-------+-------+-------+-------+-------+-------++  R 1.0 + +  O | |  B |1 |  A | 111 66|  B .8 + 11 66 +  I | 11 66 |  L | 11 6 |  I | 11 66 |  T .6 + 1 22222 6 +  Y | 11 222 22 6 |  .5 + 122 2 6 +  O | 2211 2 66 |  F .4 + 22 1 22 6 +  | 2 11 2 55*5555 |  R | 22 1 24444** 6 555 |  E | 222 11 442 55 *4 55 |  S .2 + 22 11 **33 *2 6 44 555 +  P | 222 3*** 5*33*6 44 555|  O |2 333344 1155 66 **3 444 |  N | 33333334444 55551*** 2**33 444444 |  S .0 +**************************66666 11111111***************+  E ++-------+-------+-------+-------+-------+-------+-------++  -4 -3 -2 -1 0 1 2 3  PERSON [MINUS] ITEM MEASURE | WAVE 4 CATEGORY PROBABILITIES: MODES - Andrich thresholds at intersections  P -+-------+-------+-------+-------+-------+-------+-------+-  R 1.0 + +  O | |  B |11 |  A | 111 66|  B .8 + 11 66 +  I | 11 66 |  L | 11 66 |  I | 11 6 |  T .6 + 1 6 +  Y | 11 2222222 66 |  .5 + 1222 22 6 +  O | 2211 2 6 |  F .4 + 22 1 2 6 +  | 2 1 2 555*5555 |  R | 22 11 2444**4 6 555 |  E | 222 11 442 5 *4 55 |  S .2 + 22 1 3**33** 66 44 555 +  P | 222 33**4 5 3** 44 555|  O |22 333 44 11*5 66 *33 444 |  N | 33333334444 5555 *** 22**33 44444 |  S .0 +**************************66666 11111111***************+  E -+-------+-------+-------+-------+-------+-------+-------+-  -4 -3 -2 -1 0 1 2 3  PERSON [MINUS] ITEM MEASURE |
| Wave 5 CATEGORY PROBABILITIES: MODES - Andrich thresholds at intersections  P -+---------+---------+---------+---------+---------+---------+-  R 1.0 + +  O | |  B | |  A | 666|  B .8 + 666 +  I |11 66 |  L | 11 66 |  I | 111 66 |  T .6 + 1 6 +  Y | 11 2222222 66 |  .5 + 112222 222 6 +  O | 2211 2 6 |  F .4 + 22 11 22 66 +  | 222 1 2 555*55555 |  R | 22 11 24444***466 555 |  E |222 11 4442 55 644 555 |  S .2 + 11 3**3333*2 66 444 5555 +  P | 33*** 5533** 44 5555|  O | 33333444 1*55 666 **3 4444 |  N | 3333333344444 5555 ****1 2***333 444444 |  S .0 +***********************66666 111111111*******************+  E -+---------+---------+---------+---------+---------+---------+-  -3 -2 -1 0 1 2 3  PERSON [MINUS] ITEM MEASURE | WAVE 6 CATEGORY PROBABILITIES: MODES - Andrich thresholds at intersections  P -+---------+---------+---------+---------+---------+---------+-  R 1.0 + +  O | |  B | |  A | 666|  B .8 + 666 +  I |11 66 |  L | 111 66 |  I | 11 66 |  T .6 + 11 6 +  Y | 1 2222222 66 |  .5 + 11 222 22 6 +  O | 22*1 22 66 |  F .4 + 22 11 2 6 +  | 222 11 22 55*5555 |  R | 22 1 244444***66 5555 |  E |222 11 4442 55 644 555 |  S .2 + 11 33**3333** 66 444 555 +  P | 333*** 5533** 44 55555|  O | 3333 444 1**5 6662**3 4444 |  N | 3333333344444 5555 6***1 2***333 444444 |  S .0 +***********************66666 111111111*******************+  E -+---------+---------+---------+---------+---------+---------+-  -3 -2 -1 0 1 2 3 |
